# Supplementary material for: fruitless tunes functional flexibility of courtship circuitry during development
Source: eLife. 2021 Jan 19;10:e59224. doi: 10.7554/eLife.59224 (PMC7861613; doi:10.7554/eLife.59224)
Supplement: Figure 1—source data 1. [file elife-59224-fig1-data1.xlsx]

## Sheet: figure 1
figure1-A male-female courtship index			figure1-C male-female courtship index by tub-GAL80ts/+; fruGAL4/UAS-fruMi										figure1-D male-female percentage mated
fruGAL4/UAS-fruMiScr	fruGAL4/UAS-fruMi		Stage 1	Stage 2	Stage 3	Stage 4	Stage 5	Stage 6	Stage 7	Stage 8	Stage 9		Stage 1	Stage 2	Stage 3	Stage 4	Stage 5	Stage 6	Stage 7	Stage 8	Stage 9
63	0		90	95	87	43	2	64	96	84	95		20 out of 24	21 out of 24	19 out of 24	3 out of 24	0 out of 24	5 out of 24	12 out of 24	23 out of 24	18 out of 24
90	0		92	94	92	83	1	69	97	94	84
75	0		95	96	58	20	19	86	73	64	97
69	5		91	96	97	41	5	82	94	93	74
82	0		93	95	88	30	9	89	94	78	83
82	0		95	97	76	42	7	56	96	90	90
63	0		85	95	92	86	12	96	94	87	94
94	0		88	88	86	80	0	55	97	97	97
87	0		94	92	95	68	2	73	93	93	95
92	0		94	97	92	86	7	71	94	96	91
84	0		93	97	49	38	0	64	96	95	88
69	0		96	95	88	59	33	61	97	81	75
89	0		90	75	94	84	9	59	95	91	95
86	0		89	92	95	71	3	95	78	94	70
93	0		89	97	88	34	6	86	93	83	90
83	0		97	96	97	43	2	84	95	71	94
72	0		85	97	60	66	11	57	93	88	77
69	0		36	33	95	69	3	64	93	94	79
79	0		97	94	94	74	25	87	55	96	94
83	4		91	96	93	86	11	60	88	80	74
86	0		95	89	92	39	9	40	94	93	92
85	0		93	95	94	54	8	65	42	94	76
88	0		85	94	97	33	1	63	96	94	56
91	0		65	78	92	61	20	82	95	69	73
