# Supplementary material for: fruitless tunes functional flexibility of courtship circuitry during development
Source: eLife. 2021 Jan 19;10:e59224. doi: 10.7554/eLife.59224 (PMC7861613; doi:10.7554/eLife.59224)
Supplement: Figure 2—source data 1. [file elife-59224-fig2-data1.xlsx]

## Sheet: figure 2
figure2A male-female courtship index									figure2B male-male courtship index									figure2C male chaining index
18℃ wtcs	30℃ wtcs	18℃ Tubp-Gal80ts/UAS-traF; fruGal4	30℃ Tubp-Gal80ts/UAS-traF; fruGal4	18℃ Tubp-Gal80ts/UAS-fruMiScr; fruGal4	30℃ Tubp-Gal80ts/UAS-fruMiScr; fruGal4	18℃ Tubp-Gal80ts/UAS-fruMi; fruGal4	30℃ Tubp-Gal80ts/UAS-fruMi; fruGal4		18℃ wtcs	30℃ wtcs	18℃ Tubp-Gal80ts/UAS-traF; fruGal4	30℃ Tubp-Gal80ts/UAS-traF; fruGal4	18℃ Tubp-Gal80ts/UAS-fruMiScr; fruGal4	30℃ Tubp-Gal80ts/UAS-fruMiScr; fruGal4	18℃ Tubp-Gal80ts/UAS-fruMi; fruGal4	30℃ Tubp-Gal80ts/UAS-fruMi; fruGal4		20℃ wtcs	30℃ wtcs	20℃ Tubp-Gal80ts/UAS-traF; fruGal4	30℃ Tubp-Gal80ts/UAS-traF; fruGal4	20℃ Tubp-Gal80ts/UAS-fruMiScr; fruGal4	30℃ Tubp-Gal80ts/UAS-fruMiScr; fruGal4	20℃ Tubp-Gal80ts/UAS-fruMi; fruGal4	30℃ Tubp-Gal80ts/UAS-fruMi; fruGal4
75.9211	88.859	84.7685	80.7125	91.7633	88.9564	86.7099	87.3944		0.213444	0.250823	0.152267	34.4427	0.281073	0.239972	0.177667	1.9083		0	0	0	14.661	0	3.76511	0	34.2459
87.0039	86.9203	36.5128	79.1859	81.1283	89.347	29.7201	88.3918		0.293319	0.17817	0.370608	4.1985	0.273903	0.206566	0.31	0.747705		0	0	0	16.7714	0	0.468625	0	6.59107
72.624	88.8019	79.3882	81.2454	91.53	89.2998	85.3256	77.6348		0.124653	0.204896	0.189156	0	0.053431	0	0	0.595469		0	0	0	4.45545	0	0.102625	0	12.2232
84.3373	89.054	89.1365	83.1016	79.6383	88.3743	29.8242	84.9289		0.39242	0	0.096615	0	0.281802	0.147535	0.132333	0.183899		0	0	0	22.2013	0	4.21571	0	9.99089
86.4965	89.0708	57.8129	84.7394	73.2967	85.1395	55.2399	82.7944		0.376	0	0.333812	0	0.289066	0	0.618	0		0	0	0	0	0	0	0	0
79.885	86.234	78.6385	81.6257	89.2867	87.5951	61.3723	89.7467		0.239819	0	0.258302	5.36733	0	0	0	0.097562		0	0	0	0	0	4	0	0
86.6319	64.0498	82.1078	86.3257	42.3417	87.4392	96.0164	87.5759		0.096115	0	0	5.59033	0	0	0	0.250823		0	0	0	0	0	0.333333	0	1.33333
83.7718	87.4849	71.4846	85.5502	68.5418	84.7892	83.8766	65.4078		0	0	0	0	0	0	0	0.17817		0	0	0	25.1667	0	0	0	0.5
84.2685	85.8867	88.8636	86.691	68.8817	71.7122	91.2299	86.0151		0	0	0	0	0	0	0	0.204896					9.33333		0		1.33333
79.4202	88.0384	85.194	84.31	91.7203	86.0621	92.2651	32.1641		0	0	0	0	0	0	0	0					5		0		1.66667
83.9563	84.5221	83.0836	86.9594	93.5112	86.1511	89.6499	72.4943		0	0	0	0	0	0.058701	0	0							0		20.3433
93.0417	77.4435	71.6612	85.6186	86.4739	88.4284	20.2858	88.19		0	0	0	0	0	0.063962	0	0							0		5.60667
87.5344	86.8035	75.4917	87.7603	71.2617	89.8941	83.5819	79.897		0	0	0	0.759684	0	0	0	0							10.435		8.04833
86.112	86.487	68.9071	89.4514	95.3467	69.2529	69.2684	89.5692		0	0	0	0.250188	0	0	0	0							0		2.355
68.4034	85.2181	34.8913	85.0806	89.9217	89.4556	67.4115	34.1705		0	0	0	10.0267	0	0	0	0							0.736667		2.43167
88.5042	79.794	84.9379	87.3546	95.3033	22.6332	81.0813	88.163		0	0	0	24.7182	0	0.082733	0	0							0.183333		15.7567
92.1324	86.6835	78.5223	82.8209	68.4217	87.0584	85.8431	31.4213		0	0	0	0	0	0.124438	0	0							2.11167		20.215
	80.474	89.4407	79.7743	94.765	84.894	76.0957	89.9202		0	0	0	0	0	0.189635	0	0							0.11		0.33
	88.0514	74.3982	79.7235	85.6761	87.7197	46.462	86.7389
	86.0714	70.3367	85.8203	83.8528	87.4213	85.4508	85.7327
	79.5444	91.4696	32.2779	76.0172	80.874	54.6711	84.5592
	90.3952	72.248	41.9502	31.8509	89.726	77.0056	79.0041
	85.1235	89.1424	32.5071	83.5723	89.9141	82.9681	31.8657
	86.5711			77.2117	86.9768	65.2644	25.3184
	40.544				22.2897		84.1843
	42.3011				40.389		34.3586
					88.5222		80.1262
							88.0081
