# Supplementary material for: fruitless tunes functional flexibility of courtship circuitry during development
Source: eLife. 2021 Jan 19;10:e59224. doi: 10.7554/eLife.59224 (PMC7861613; doi:10.7554/eLife.59224)
Supplement: Figure 3—figure supplement 1—source data 1. [file elife-59224-fig3-figsupp1-data1.xlsx]

## Sheet: Figure 3-figure supplement 1
	Figure 3-figure supplement 1 male-male (M-M) courtship or male-female (M-F) courtship index
	M-M UAS-fruMi/+;fruGal4/+ without food	M-M UAS-fruMi/+;fruGal4/+ on food	M-M UAS-GFP/+;fruGal4/+ without food	M-M UAS-GFP/+;fruGal4/+ on food	M-F UAS-fruMi/+;fruGal4/+ without food	M-F UAS-fruMi/+;fruGal4/+ on food	M-F UAS-GFP/+;fruGal4/+ without food	M-F UAS-GFP/+;fruGal4/+ on food
	37.34	38.5933	0.31	0	0.89	4.00167	90.32	91.4267
	39.26	71.8137	0.06	0.5	0	1.52	88.63	86.9167
	12.8	51.7192	0.09	4.5	0	0.246667	88.82	94.0433
	16.47	46.7903	0.06	0.333333	0.05	42.9967	29.33	58.0067
	20.21	65.238	0.97	0.5	21.2	7.43833	85.87	61.2233
	6.42	24.8142	0.18	1.33333	1.51	0	93.51	93.7433
	53.72	69.096	0.12	0	0.55	0	89.02	93.57
	35.29	54.5283	0.53	0	0.81	0.163333	88.53	96.695
	15.07	60.9675	0.1	0.5	0.6	14.3367	84.28	94.6383
	15.24	80.8467	0.37	0.833333	0.38	0	87.12	78.9467
	30.69	49.836	0.3	0	0	0.308333	87.02	93.45
	2.34	64.2728	0.42	0	0.6	0.76	87.11	85.5817
	3.72	59.7498	1.25	0	0	35.2117	90.53	93.4167
	15.89	10.074	0.99	0	0	0.388333	91.22	82.4733
	12.72	82.4957	0.17	0	0.28	0	73.36	90.3483
		41.555		0	0	0.256667	89.36	92.3917
		62.426		0	0	0	89.34	85.9133
				0	14.58	2.43	87.28	91.525
