# Supplementary material for: fruitless tunes functional flexibility of courtship circuitry during development
Source: eLife. 2021 Jan 19;10:e59224. doi: 10.7554/eLife.59224 (PMC7861613; doi:10.7554/eLife.59224)
Supplement: Figure 3—figure supplement 2—source data 1. [file elife-59224-fig3-figsupp2-data1.xlsx]

## Sheet: Figure 3-figure supplement 2
	Figure 3-figure supplement 2 male-female (M-F) courtship or male-male (M-M) courtship index
	M-F fru4-40/+	M-M fru4-40/+	M-F fru4-40/frusat15	M-M fru4-40/frusat15	M-F fru4-40/fruAJ96u3	M-M fru4-40/fruAJ96u3
	90.01	0.4	0	2.82	0	4.72
	86.72	0.71	0	1.3	0	4.47
	87.2	0.46	0	1.52	0	2.51
	86.53	0.29	0	1.65	0	1.85
	86.24	0.07	0	1.82	0	10.09
	88.08	0.27	0	1.13	0	2.26
	83.15	1.97	0	0.39	0	5.45
	78.85	1.35	0	1.55	0	1.8
	92.6	0.75	0	16.6	0	2.14
	50.19	0.87	0	0.42	0	2.85
	82.62	0.63	0	0.81	0	2.23
	88.58	1.23	0	15.4	0	1.82
	Figure 3-figure supplement 2
	chaining index	fru4-40/+
	3h	0	0	0	0	0	0	0	0
	1d	0	0	0	0	0	0	0	0
	2d	0	0	0	0	0	0	0	0
	3d	0	0	1.15	0	0	0	0	0
		fru4-40/fruSat15
	3h	0.66	0	0.21	0.02	0	0.35	0	0.7
	1d	2.84	1.93	0.12	0	9.88	3.61	2.14	1.93
	2d	9.54	6.03	10.4	17.4	65.7	48.9	3.69	27
	3d	68.2	31.1	64.3	68.1	86.2	91.1	17.4	53.9
		fru4-40/fruAJ96u3
	3h	7.94	1.58	0	0.77	0.7	0.83	0.46	0
	1d	14.8	67.7	76.1	6.73	80.7	57.2	40.2	38.5
	2d	90.9	99.6	86.8	95.4	98.6	94.3	91.2	80.4
	3d	91.2	91.5	89.6	95.6	94.7	93	88.9	75.9
