# Supplementary material for: fruitless tunes functional flexibility of courtship circuitry during development
Source: eLife. 2021 Jan 19;10:e59224. doi: 10.7554/eLife.59224 (PMC7861613; doi:10.7554/eLife.59224)
Supplement: Figure 3—figure supplement 4—source data 1. [file elife-59224-fig3-figsupp4-data1.xlsx]

## Sheet: Figure 3-figure supplement 4
Figure 3-figure supplement 4	male-female (M-F) courtship or male-male (M-M) courtship index
	M-F P1-splitGAL4 UAS-fruMiScr	M-F P1-splitGAL4 UAS-fruMi	M-M P1-splitGAL4 UAS-fruMiScr	M-M P1-splitGAL4 UAS-fruMi		chaining index	P1-splitGAL4 UAS-fruMi								P1-splitGAL4 UAS-fruMiScr
	80.05	92.14	0.86	0		3h	1.17	2.96	0.43	0.03	0.18	0	0	0	0	0.12	0.19	0.08	0.16	0.07	0.07	0.07
	79.64	87.94	5.1	0.5		1d	6.38	2.75	4.07	0.56	0.13	0.05	3.07	2.87	0.34	0.22	0.7	0.71	0.21	0.11	0	0.42
	80.21	90.64	0.71	21.05		2d	3.99	3.82	7.88	7.62	1.44	6.42	2.37	5.69	0.24	0.22	1.07	1.65	0	0.69	2.03	0.46
	68.82	89.71	0	0		3d	1.29	0.95	0.92	1.02	4.92	4.52	14.7	13.1	1.12	1.14	3.4	2.58	0.56	1.69	0.49	0.51
	69.51	91.15	2.24	0
	77.26	63.16	0.26	0.33
	93.42	80.96	4.42	0.33
	93.035	79	0	0.4
	92.2933	80.82	0.8	0
	89.3433	75.35	1.12	0
	88.9067	81.71	0	0
	90.4683	83.11	3.18	0
	91.43	88.8967	0.74	0.69
	88.37	94.0217	0.65	5.58
	90.42	93.6817	0.34	0
	88.49	89	0.38	0.4
	92.72	93.165	0.13	1.74
	88.24	93.3167	0.24	1.41
Figure 3-figure supplement 4	male-female (M-F) courtship or male-male (M-M) courtship index
	M-F ppk23-GAL4 UAS-fruMiScr	M-F ppk23-GAL4 UAS-fruMi	M-M ppk23-GAL4 UAS-fruMiScr	M-M ppk23-GAL4 UAS-fruMi		chaining index	ppk23-GAL4 UAS-fruMi								ppk23-GAL4 UAS-fruMiScr
	90.52	92.3283	0.23	27.2283		3h	0	1.13	0.28	0.99	15.1	19.4	0.54	0	1.75	0.02	0.49	8.36	1.41	0	6.08	2.02
	91.47	47.69	0.35	57.435		1d	2.3	2.82	0.77	4.68	3.85	1.29	2.07	1.01	0.2	0.15	0.09	0.81	0.82	0.44	0.11	3.78
	89.94	80.715	0	18.3533		2d	2.73	1.23	0.15	11.9	0.23	0.05	0.03	0.17	0.54	2.14	0.1	0	0.04	0.11	0.25	0.18
	84.43	89.3433	6.3	0		3d	2.76	0.12	0	12.7	1.47	0.55	10	1.49	3.8	1.77	0.09	0.19	0	0	1.18	0
	91.71	86.2983	0.03	17.6117
	89.65	90.81	0	45.06
	94.25	94.25	13.05	42.12
	91.81	91.81	4.07	33.5
	93.84	93.84	0.09	16.37
	85.55	85.55	2.99	37.44
	91.71	91.71	0.37	13.47
	92.91	92.91	0	54.08
	83.63	80.77	0.59	16.03
	81.9183	81.04	0.61	0.46
	81.7733	67.03	0	51.2
	77.8667	71.5	0	65.71
	80.45	68.63	10.56	66.13
	81.5083	69.36	1.36	56.86
