# Supplementary material for: fruitless tunes functional flexibility of courtship circuitry during development
Source: eLife. 2021 Jan 19;10:e59224. doi: 10.7554/eLife.59224 (PMC7861613; doi:10.7554/eLife.59224)
Supplement: Figure 3—source data 1. [file elife-59224-fig3-data1.xlsx]

## Sheet: figure 3
	figure 3 A,C,G,J,M male-female (M-F) courtship or male-male (M-M) courtship index
	Otd-Flp/UAS-GFP; fruGal4/+ M-F	Otd-Flp/UAS-GFP; fruGal4/+ M-M	fru4-40/fruLexA M-F	fru4-40/fruLexA M-M	Otd-Flp/UAS-fruMi; fruGal4/+ M-F	Otd-Flp/UAS-fruMi; fruGal4/+ M-M	Otd-Flp/UAS-fruMi; Tubp>Gal80>/fruGal4 M-F	Otd-Flp/UAS-fruMi; fruGal4/Tubp>Gal80> M-M	Otd-Flp/UAS-fruMi; Tubp>>Gal80/fruGal4 M-F	Otd-Flp/UAS-fruMi; fruGal4/Tubp>>Gal80 M-M
	91.4267	0	0	0	4.00167	69.2782	50.0883	8.42067	94.0711	88.8528
	86.9167	0.5	0	0	1.52	75.3492	3.40167	23.8912	91.9189	81.8778
	94.0433	4.5	0	0	0.246667	38.5933	28.4767	12.0778	78.4188	88.0605
	58.0067	0.333333	0	8	42.9967	71.8137	79.35	4.12	83.2326	82.7245
	61.2233	0.5	0	20	7.43833	51.7192	91.36	3.26033	76.4975	83.671
	93.7433	1.33333	0	3	0	46.7903	17.23	1.87233	64.5005	82.9857
	93.57	0	0	0	0	65.238	40.9417	12.009	83.2033	84.877
	96.695	0	0	0	0.163333	24.8142	55.5183	18.285	79.6561	90.1392
	94.6383	0.5	0	3	14.3367	69.096	93.465	42.6442	97.9933	80.0488
	78.9467	0.833333	0	0	0	54.5283	76.4983	22.8915	92.88	87.046
	93.45	0	0	0	0.308333	60.9675	76.3533	1.90867	67.1533	61.3642
	85.5817	0	0	8	0.76	80.8467	67.9533	4.42267	86.8967	80.4265
	93.4167	0	0	0	35.2117	49.836	46.6333	56.762	79.7033	94.2287
	82.4733	0	0	0	0.388333	64.2728	33.6583	39.5852	39.7267	94.2777
	90.3483	0	0	0	0	59.7498	41.2467	40.4878	97.3267	96.1495
	92.3917	0	0	0	0.256667	10.074	65.1917	27.0555	93.1117	94.0462
	85.9133	0	0	7	0	82.4957	84.075	4.488	95.5833	86.7715
	91.9633	0	0	5	0	41.555	91.2117	3.24767	89.42	89.2697
	81.05	0	0	0	0.7	62.426	96.085	4.74083	70.6017	88.8528
	98.8867	0	0	4	1.755		93.5567	13.1527	97.045	81.8778
	96.5883	0	0	0	28.04		15.2883	6.68183	92.245	88.0605
	91.525	0	0	0	0		46.3533	12.2842	88.785	82.7245
	89.4767	0	0	11	0		51.245	2.36267	76.6417	83.671
	88.5983	0	0	0	0.148333		13.51		72.765	82.9857
	figure 3 B,D,H,K,N chaining index
		Otd-Flp/UAS-GFP;fruGal4/+
	3h	0	0	0	0	0	0	0	0
	1d	0	0	0	0	0	0	0	0
	2d	0	0	0	0	0	0	0	0
	3d	0	0	0	0	0	0	0	0
		fru4-40/fruLexA
	3h	0	0	0	6	0	12	5	4
	1d	45	46	65	43	54	28	32	17
	2d	66	56	52	76	38	23	63	72
	3d	74	66	70	57	63	25	48	18
		Otd-Flp/UAS-fruMi;fruGal4/+
	3h	54.95	93.8917	77.55	97.6133	91.8017	77.4383	81.55
	1d	97.045	98.7733	97.145	94.4383	98.8967	98.57	99.09
	2d	82.8783	93.6117	94.38	96.3033	80.41	94.505	91.7633
	3d	92.3417	94.3667	95.635	88.6	86.5717	90.8133	83.5333
		Otd-Flp/UAS-fruMi;Tubp>Gal80>/fruGal4
	3h	0.166667	4.78333	35.5683	2.66167	3.18167	9.755
	1d	31.575	2.78667	63.8467	13.0917	6.245	28.81
	2d	14.6767	25.4933	51.88	68.235	84.565	82.1583
	3d	36.505	92.0467	54.03	54.7517	89.5583	86.0717
		Otd-Flp/UAS-fruMi;Tubp>>Gal80/fruGal4
	3h	83.145	99.16	82.325	100	96.995	100	99.6483	81.915
	1d	42.8367	35.725	10.7633	16.5483	65.7117	80.7983	88.8517	18.8267
	2d	19.2933	64.185	30.0433	4.885	14.78	7.72167	0.306667	0.578333
	3d	25.6117	19.0983	7.35167	11.825	37.8033	24.7917	25.9667	7.675
